# Supplementary material for: Enhanced electrooxidation of glucose at nano-chitosan–NiOOH modified GC electrode: fuel blends and hydrocarbon impurities
Source: Royal Society of Chemistry journal article supplement (doi:10.1039/c6cp08360a), 2016-12-22
Supplement: c6cp08360a1.pdf [file c6cp08360a1.pdf]

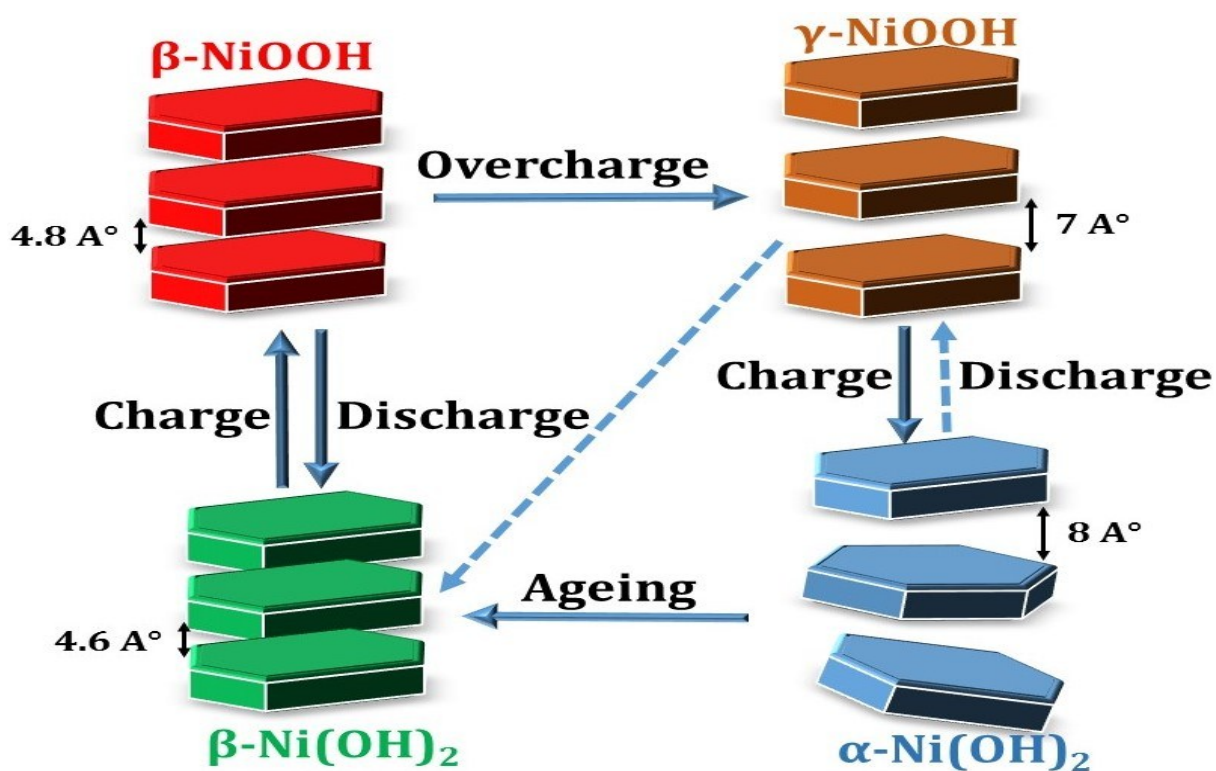

Schematic diagram S1: representation of the Bode scheme for the Ni(II)/Ni(III) redox transition in Ni hydroxide layers<sup>1,2</sup>.

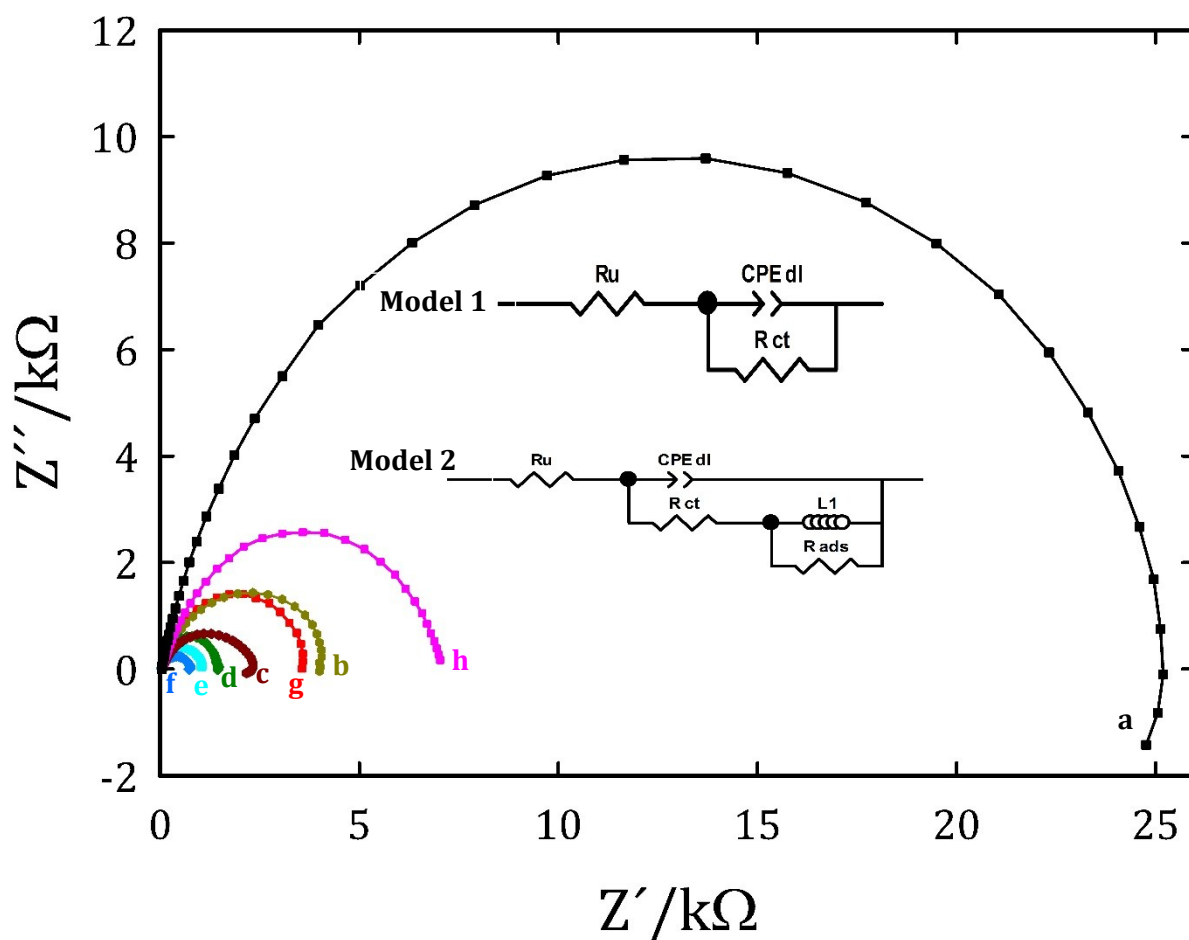

Figure S1: Nyquist plot obtained at nano-CS-NiOOH/GC electrode with various nickel compositions (typically: a) 0%, b) 10%, c) 20%, d) 30%, e) 40%, f) 50%, g) 70% and h) 100%) in 0.1 M NaOH containing 1 mM glucose at 0.42 V vs SCE. Catalyst loading is 2 mg cm<sup>-2</sup>. Equivalent circuit model 1 is used for nickel composition higher than 50%, while model 2 is used to fit the data of the electrode with nickel composition less than 50%.

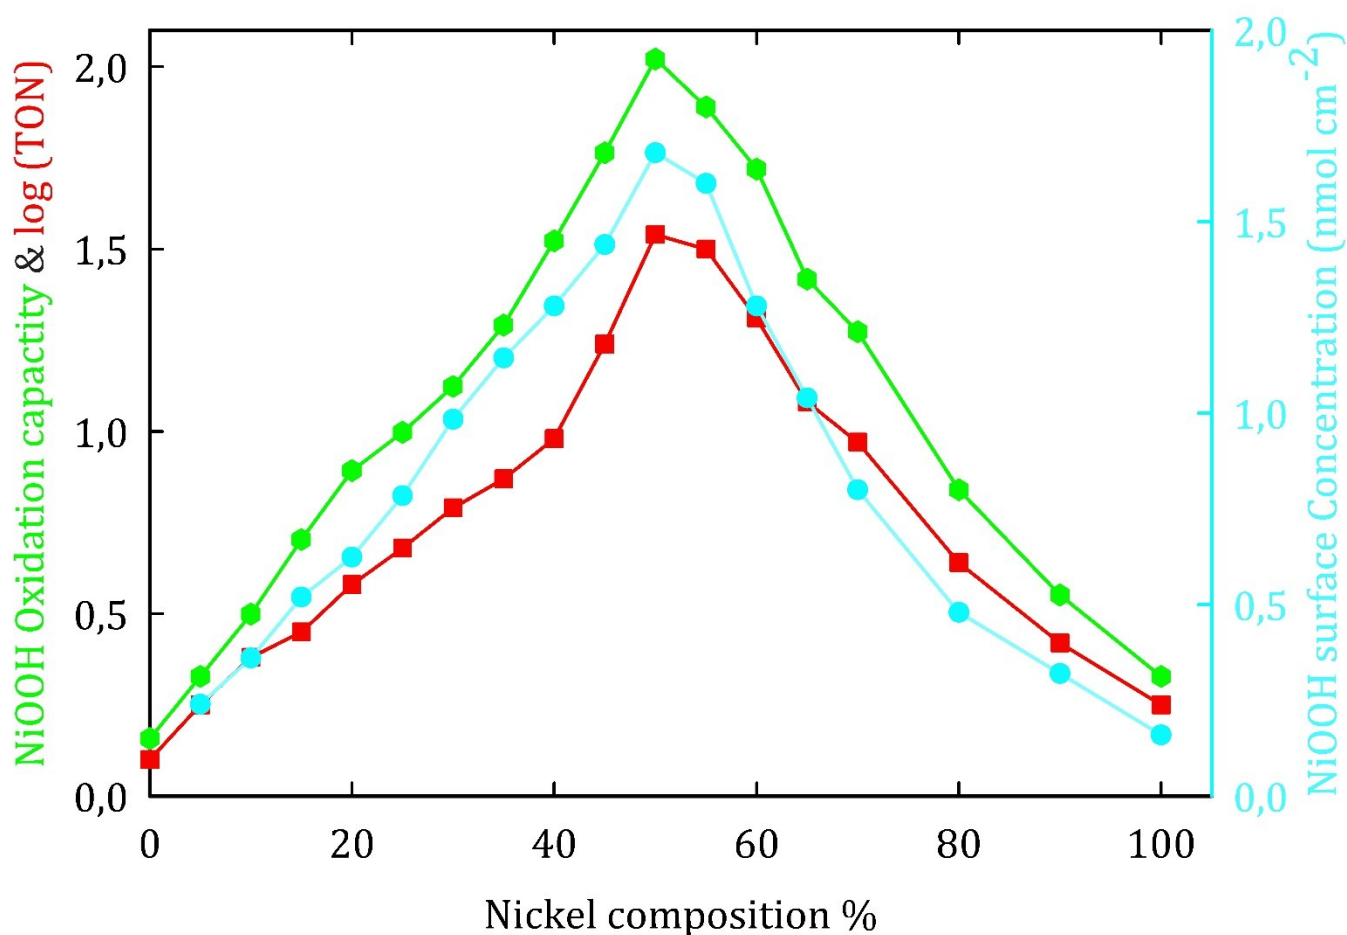

Figure S2: the variation of the NiOOH surface concentration (cyan line), NiOOH oxidation capacity (light green line) and number of oxidized glucose molecules per active NiOOH per second (TON, red line) with the nickel composition (%). NiOOH average surface concentration was estimated by integrating the area under the anodic peak of the redox Ni(OH)<sub>2</sub>/NiOOH: Surface concentration =  $Q/nF$ , where the Q is the amount of charge consumed during Ni(OH)<sub>2</sub>/NiOOH transformation c/cm<sup>2</sup>, F is the faradays constant, and n is the number of electron (n=1). While the TON and NiOOH capacity are calculated as in Figure 6.

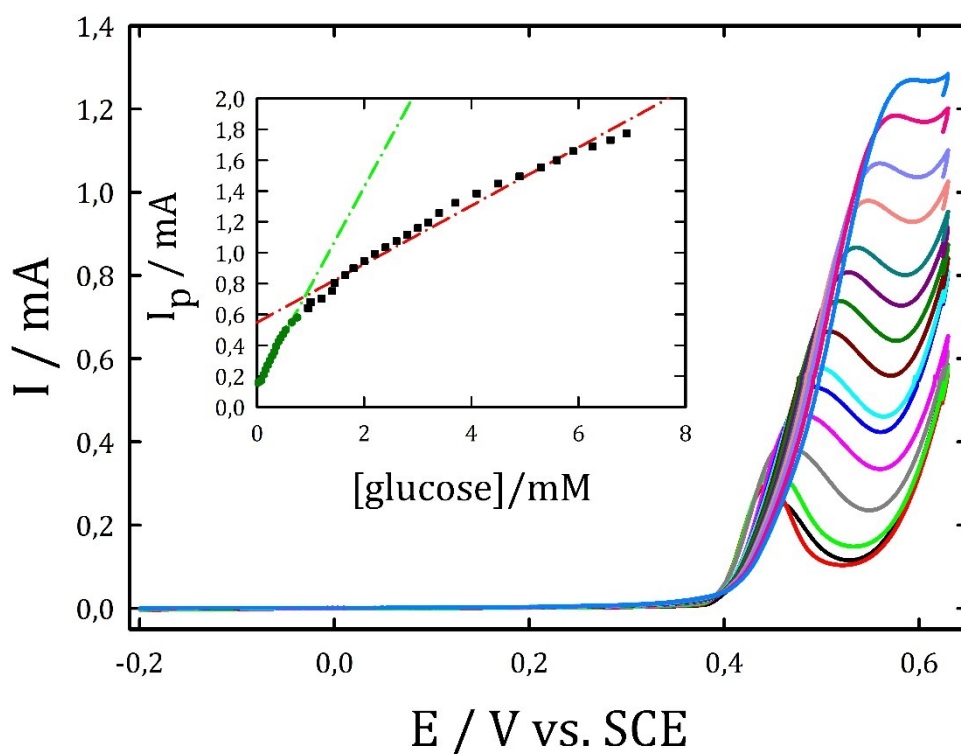

Figure S3: LSVs obtained at nano-CS-NiOOH/GC electrode in 0.1 M NaOH containing various glucose concentrations (minimum  $0,5\mu\text{M}$  and maximum 7 mM). Inset shows the variation of the glucose oxidation peak current ( $I_p$ ) with glucose concentration ( $[\text{glucose}]$ ).

|  | Sensitivity ( $\mu\text{A mM}^{-1} \text{cm}^{-2}$ ) | Linear range                      |
|--|------------------------------------------------------|-----------------------------------|
|  | 221                                                  | 1-8 mM                            |
|  | 325                                                  | 0,5-4 mM                          |
|  | 463                                                  | 0,3-2 mM                          |
|  | 583                                                  | Up to 4 mM                        |
|  | 648 and 1890                                         | Up to 1,7 mM and between 1,7-7 mM |
|  | 120                                                  | 0,4-2,3 mM                        |
|  | 24                                                   | 0,8-1,9 mM                        |

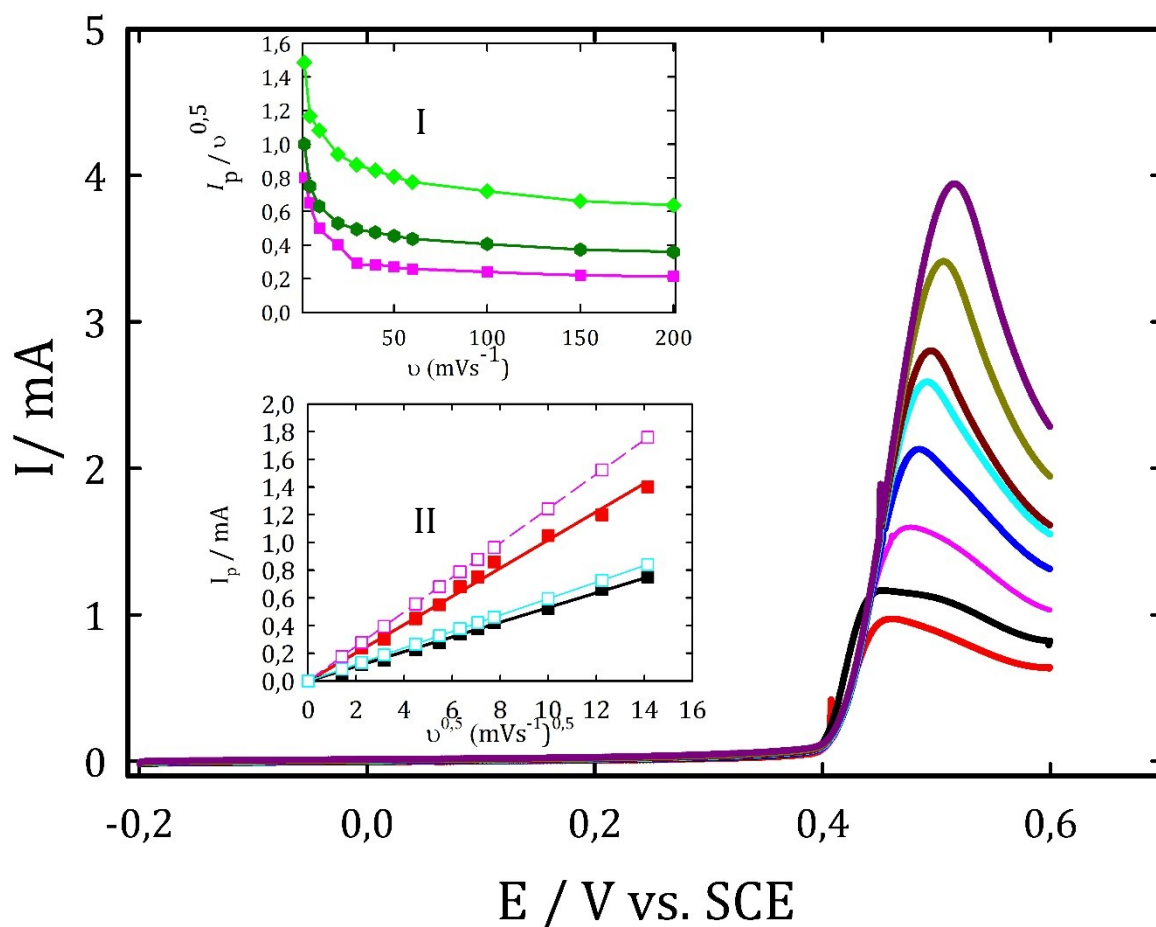

Figure S4: the LSVs of glucose oxidation obtained at nano-CS-NiOOH/GC electrode with 50% nickel in 1 mM glucose at various scan rate (minimum scan rate 2 mV/s and maximum scan rate 200 mV/s). Inset I shows the variation of  $I_p/v^{0.5}$  with scan rate ( $v$ ) of nano-CS-NiOOH/GC electrodes with 10% (pink line), 30% (green line) and 50% (light green line) nickel and Inset II shows the variation of  $I_p$  with  $v^{0.5}$  of nano-CS-NiOOH/GC electrodes with 70% (red line) and 100% (black line) nickel. The cyan and pink dashed lines show the Theoretical plot of Randles-Sevcik equations for 70% and 100%, respectively.

The peak current,  $I_p$  of diffusion-controlled totally irreversible process can be given by Randles-Sevcik equation:  $I_p = 2.99 \times 10^5 n (\alpha n_\alpha)^{0.5} A C (Dv)^{0.5}$ , where  $I_p$  is the peak current (A),  $n$  is the total number of electrons,  $\alpha$  is the charge transfer coefficient,  $na$  is the number of electrons in the rate determining step ( $na = 1$ ),  $A$  is the surface area of the working electrode ( $\text{cm}^2$ ),  $D$  is the diffusion coefficient of the glucose,  $C$  is the bulk concentration of the glucose and  $v$  is the scan rate ( $\text{V s}^{-1}$ ). It was calculated using values of  $D = 6.7 \times 10^{-6} \text{ cm}^2 \text{ s}^{-1}$ ,  $A = 0.7 \text{ cm}^2$  and  $\alpha$  (as calculated from the slope of Tafel plot given in Figure S5)<sup>3</sup>.

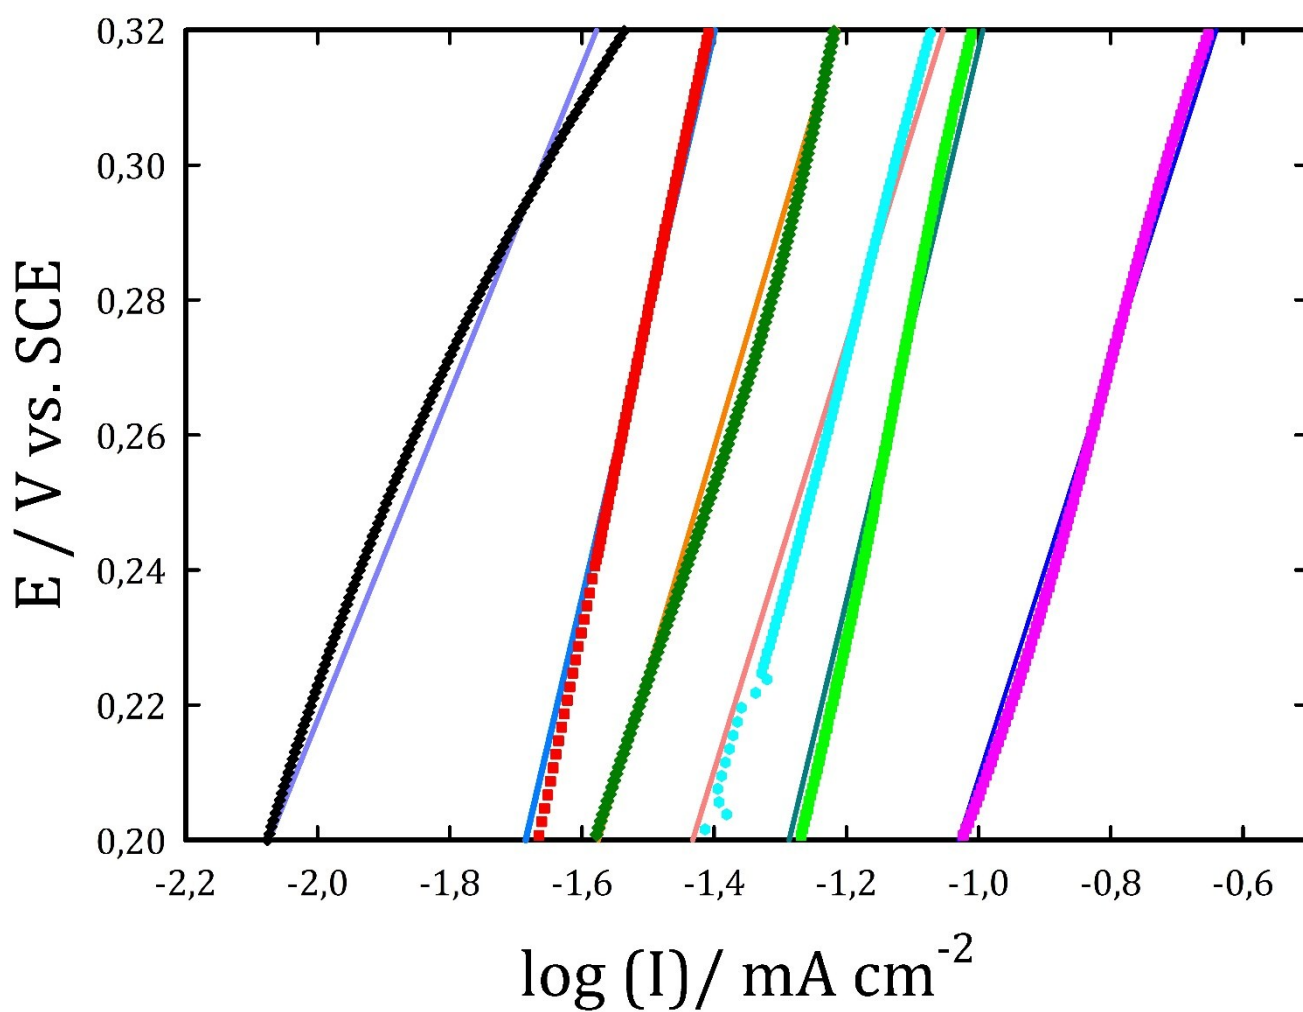

Figure S5: Tafel plot of nano-CS-NiOOH/GC electrode with various nickel compositions, typically, 100% (black line), 70% (red-line), 10% (pink line), 30% (green line), 40% (cyan line) and 50% (pink line).

1. P. Oliva, J. Leonardi, J. Laurent, C. Delmas, J. Braconnier, M. Figlarz, F. Fievet and A. De Guibert, *Journal of Power Sources*, 1982, **8**, 229-255.
2. R. L. Doyle, I. J. Godwin, M. P. Brandon and M. E. G. Lyons, *Physical Chemistry Chemical Physics*, 2013, **15**, 13737-13783.
3. A. S. Danial, M. M. Saleh, S. A. Salih and M. I. Awad, *Journal of Power Sources*, 2015, **293**, 101-108.
